# Supplementary material for: Using qualitative exit interviews to explore schizophrenia burden and treatment experience in clinical trial patients
Source: Frontiers journal article supplement (doi:10.3389/fpsyt.2024.1377174), 2024-08-21
Supplement: Data_Sheet_1.PDF [file Data_Sheet_1.PDF]

## Supplementary Material

### SUPPLEMENTAL TABLES

**Table S1. Background Characteristics**

| Parameter                                                | Participants (N=41) |
|----------------------------------------------------------|---------------------|
| <b>Living Situation, n (%)</b>                           |                     |
| Lives with relative(s)                                   | 13 (31.7)           |
| Parent                                                   | 7 (17.1)            |
| Sibling                                                  | 3 (7.3)             |
| Other                                                    | 3 (7.3)             |
| Lives with significant other and/or children             | 10 (24.4)           |
| Lives alone                                              | 10 (24.4)           |
| Lives with roommates                                     | 4 (9.8)             |
| Lives in transitional housing                            | 4 (9.8)             |
| <b>Current Employment Status, n (%)</b>                  |                     |
| Does not work                                            | 30 (73.2)           |
| Unspecified income source                                | 17 (41.5)           |
| Disability/social security <sup>a</sup>                  | 10 (24.4)           |
| Currently in school                                      | 2 (4.9)             |
| Works                                                    | 11 (26.8)           |
| Landscaping                                              | 2 (4.9)             |
| Unspecified                                              | 2 (4.9)             |
| Boarding home                                            | 1 (2.4)             |
| Electrician work                                         | 1 (2.4)             |
| Gas station                                              | 1 (2.4)             |
| Mental health field                                      | 1 (2.4)             |
| Restaurant                                               | 1 (2.4)             |
| Security                                                 | 1 (2.4)             |
| Warehouse                                                | 1 (2.4)             |
| <b>Hobbies/leisure activities,<sup>b,c</sup> n (%)</b>   |                     |
| Watches television (including sports and movies at home) | 22 (53.7)           |
| Physical activities (eg, playing sports, hiking, walks)  | 14 (34.1)           |
| Reading/writing                                          | 9 (22.0)            |
| Playing games (video games & board games)                | 8 (19.5)            |
| Going to the movie theater                               | 7 (17.1)            |
| Shopping                                                 | 6 (14.6)            |
| Music (singing, recording, listening)                    | 5 (12.2)            |
| Attending church                                         | 4 (9.8)             |
| Cooking at home                                          | 4 (9.8)             |
| Going out to eat                                         | 4 (9.8)             |
| Painting                                                 | 2 (4.9)             |
| Remodeling home                                          | 2 (4.9)             |
| No hobbies reported                                      | 2 (4.9)             |

<sup>a</sup>Five patients reported being on “disability” and 5 reported being on “social security”.

<sup>b</sup>Hobbies participated in by only 1 patient: working on car, riding bus, traveling, theme parks/zoo, visiting friends, sitting outside in wheelchair, riding motorcycle, picnics, and sitting by the water.

<sup>c</sup>Patients may have reported more than 1 activity.

**Table S2. Initial Symptoms at Time of Schizophrenia Diagnosis**

| <b>Symptoms, n (%)</b>      | <b>Participants (N=41)<sup>a</sup></b> |
|-----------------------------|----------------------------------------|
| Auditory hallucinations     | 30 (73.2)                              |
| Paranoia                    | 13 (31.7)                              |
| Visual hallucinations       | 12 (29.3)                              |
| Harmful thoughts/behaviors  | 12 (29.3) <sup>b</sup>                 |
| Suicidal thoughts/self-harm | 7 (17.1)                               |
| Violence toward others      | 5 (12.2)                               |
| Constant anger              | 1 (2.4)                                |
| Depression                  | 4 (9.8)                                |
| Anxiety/agoraphobia         | 3 (7.3)                                |
| Delusions                   | 2 (4.9)                                |
| Mood swings                 | 1 (2.4)                                |
| Racing thoughts             | 1 (2.4)                                |
| Negative self-talk          | 1 (2.4)                                |

<sup>a</sup>Patients may have reported more than one symptom.

<sup>b</sup>One patient reported suicidal ideation and violence toward others.

**Table S3. Symptoms Experienced: Lifetime and Past 30 Days**

| <b>Symptoms, n (%)</b>   | <b>Lifetime</b>   | <b>Last 30 Days</b> |
|--------------------------|-------------------|---------------------|
|                          | N=41 <sup>a</sup> | N=41 <sup>a</sup>   |
| Auditory hallucinations  | 36 (87.8)         | 18 (43.9)           |
| Paranoia                 | 24 (58.5)         | 9 (22.0)            |
| Visual hallucinations    | 18 (43.9)         | 8 (19.5)            |
| Anxiety/worry/panic      | 13 (31.7)         | 9 (22.0)            |
| Mad easily/mood          | 11 (26.8)         | 3 (7.3)             |
| Delusions                | 6 (14.3)          | 2 (4.9)             |
| Negative thoughts/urges  | 5 (12.2)          | 3 (7.3)             |
| Olfactory hallucinations | 1 (2.4)           | 0 (0)               |
| Flat affect              | 1 (2.4)           | 0 (0)               |
| No symptoms reported     | 0 (0)             | 9 (22.0)            |

<sup>a</sup>Patients may have reported more than one symptom.

**Table S4. Schizophrenia Symptom Impacts: Lifetime and Last 30 Days**

| <b>Impacts,<sup>a</sup> n (%)</b>    | <b>Lifetime<br/>(N=41)<sup>b</sup></b> | <b>Last 30 Days<br/>(N=41)</b> |
|--------------------------------------|----------------------------------------|--------------------------------|
| Work                                 | 34 (82.9)                              | —                              |
| Hospitalization                      | 30 (73.2)                              | 0 (0)                          |
| Relationships                        | 29 (70.7)                              | —                              |
| Self-esteem                          | 27 (65.9)                              | 0 (0)                          |
| Social isolation/avoiding others     | 27 (65.9)                              | 9 (22.0)                       |
| Emotional health                     | 25 (61.0)                              | 2 (4.9)                        |
| Daily activities                     | 21 (51.2)                              | 1 (2.4)                        |
| Physical health                      | 13 (31.7)                              | 3 (7.3)                        |
| Cognitive difficulties/concentration | 13 (31.7)                              | 5 (12.2)                       |
| Suicidality                          | 13 (31.7)                              | 0 (0)                          |
| Trouble sleeping/bad dreams          | 13 (31.7)                              | 4 (9.8)                        |
| Substance use                        | 9 (22.0)                               | 4 (9.8)                        |
| Trouble communicating                | 6 (14.6)                               | 0 (0)                          |
| Violent thoughts/behaviors           | 6 (14.6)                               | 0 (0)                          |
| Ability to do leisure activities     | 5 (12.2)                               | 3 (7.3)                        |
| Education                            | 5 (12.2)                               | 0 (0)                          |
| Panic attacks/nervous breakdown      | 4 (9.8)                                | 1 (2.4)                        |
| Homelessness                         | 3 (7.3)                                | 0 (0)                          |
| Incarceration                        | 3 (7.3)                                | 0 (0)                          |
| Motivation                           | 3 (7.3)                                | 0 (0)                          |
| Ability to drive                     | 2 (4.9)                                | 0 (0)                          |
| Accomplish goals                     | 2 (4.9)                                | 0 (0)                          |
| Detached from reality                | 2 (4.9)                                | 0 (0)                          |
| Diet                                 | 1 (2.4)                                | 0 (0)                          |
| Financial                            | 1 (2.4)                                | 0 (0)                          |
| Flat affect                          | 1 (2.4)                                | 0 (0)                          |
| No impact                            | 0 (0)                                  | 9 (22.0)                       |

<sup>a</sup>Patients may have reported more than 1 impact.

<sup>b</sup>To assess impacts experienced during lifetime, all instances of an impact were tallied across impacts experienced at diagnosis, impacts experienced during the past 30 days, changes in impacts while taking the study drug, and other impacts elicited during the interview.

**Table S5. Coping Mechanisms**

| <b>Coping Mechanisms, n (%)</b>  | <b>Patients, N=41</b> |
|----------------------------------|-----------------------|
| <b>Positive</b>                  | <b>36 (87.8)</b>      |
| Entertainment                    | 22 (53.7)             |
| Social activities/social support | 14 (34.1)             |
| Physical activities              | 13 (31.7)             |
| Mindfulness/meditation           | 12 (29.3)             |
| Religion                         | 7 (17.1)              |
| Therapy                          | 6 (14.6)              |
| Pets                             | 5 (12.2)              |
| Housework                        | 4 (9.8)               |
| Self-isolation                   | 3 (7.3)               |
| Marijuana use                    | 2 (4.9)               |
| Smokes cigarettes                | 2 (4.9)               |
| Employment                       | 1 (2.4)               |
| Sleeps until symptoms pass       | 1 (2.4)               |
| <b>Negative</b>                  | <b>24 (58.5)</b>      |
| Smokes cigarettes                | 16 (39.0)             |
| Alcohol/ marijuana use           | 5 (12.2)              |
| Self-isolation                   | 4 (9.8)               |
| Sleeping too much                | 2 (4.9)               |
| Repress memories                 | 2 (4.9)               |
| Fight others                     | 1 (2.4)               |
| Masking symptoms/impacts         | 1 (2.4)               |
| Kissing self                     | 1 (2.4)               |
| Talks back to voices             | 1 (2.4)               |
| <b>None</b>                      | <b>3 (7.3)</b>        |

**Table S6. Drawbacks of Previous Medications**

| <b>Drawbacks, n (%)</b>              | <b>N=41</b>      |
|--------------------------------------|------------------|
| <b>Physical health<sup>a</sup></b>   | <b>39 (95.1)</b> |
| Lack of energy/drowsy                | 23 (56.1)        |
| Weight gain                          | 19 (46.3)        |
| Involuntary movements                | 8 (19.5)         |
| Trouble sleeping                     | 7 (17.1)         |
| Queasy stomach                       | 7 (17.1)         |
| Dizziness/disoriented                | 7 (17.1)         |
| Dry mouth                            | 6 (14.6)         |
| Restlessness                         | 4 (9.8)          |
| Stiffness/tightness                  | 4 (9.8)          |
| Headaches                            | 3 (7.3)          |
| Gassy                                | 2 (4.9)          |
| Pounding heart                       | 2 (4.9)          |
| Numbness                             | 2 (4.9)          |
| Milk production                      | 2 (4.9)          |
| Blurry vision                        | 2 (4.9)          |
| Droling                              | 2 (4.9)          |
| <b>Changes in emotions/behaviors</b> | <b>17 (41.5)</b> |
| Change in mood                       | 8 (19.5)         |
| Increased appetite/compulsive eating | 7 (17.1)         |
| Lack of emotions                     | 2 (4.9)          |
| Antisocial                           | 2 (4.9)          |
| Exacerbated schizophrenia symptoms   | 2 (4.9)          |
| Loss of appetite                     | 2 (4.9)          |
| Talking to self                      | 1 (2.4)          |
| <b>Cognitive symptoms</b>            | <b>5 (12.2)</b>  |
| Not thinking clearly                 | 2 (4.9)          |
| Slurred speech/stutter               | 2 (4.9)          |
| Forgetful                            | 1 (2.4)          |

<sup>a</sup>Reported negative effects on physical health by one patient each (n=1; 2.4%): Lock jaw, low white blood cell count, erectile dysfunction, swallowing, trouble breathing, itchiness, nosebleeds, weakness, and pain.

**Table S7. Treatment Aspects Most in Need of Change**

| Symptom/Impact, n (%) | Primary Aspect           | Secondary Aspect  |
|-----------------------|--------------------------|-------------------|
|                       | N=41                     | N=23 <sup>c</sup> |
| Hallucinations        |                          |                   |
| Auditory              | 13 (31.7) <sup>a,b</sup> | 6 (26.1)          |
| Both (equally)        | 4 (9.8)                  | 0                 |
| Visual                | 3 (7.3)                  | 1 (4.3)           |
| Social/relationships  | 5 (12.2)                 | 2 (8.7)           |
| Ability to function   | 3 (7.3)                  | 1 (4.3)           |
| Anxiety               | 2 (4.9)                  | 1 (4.3)           |
| Delusions             | 2 (4.9) <sup>a</sup>     | —                 |
| Paranoia              | 2 (4.9)                  | 3 (13.0)          |
| Physical functioning  | 2 (4.9) <sup>b</sup>     | 2 (8.7)           |
| Depression            | 1 (2.4)                  |                   |
| Mood                  | 1 (2.4)                  | 2 (8.7%)          |
| Motivation            | 1 (2.4)                  | —                 |
| Negative thoughts     | 1 (2.4)                  | —                 |
| Stability in thinking | 1 (2.4)                  | —                 |
| Concentration         | —                        | 1 (4.3)           |
| Family                | —                        | 1 (4.3)           |
| Psychotic episode     | —                        | 1 (4.3)           |
| Self esteem           | —                        | 1 (4.3)           |
| Talking to self       | —                        | 1 (4.3)           |
| No aspect to improve  | 2 (4.9)                  | —                 |

Middle column does not add to 41 as patients could provide more than one response:

<sup>a</sup>One patient (2.4%) reported delusions and auditory hallucinations as equal.

<sup>b</sup>One patient (2.4%) reported physical functioning and auditory hallucinations as equal.

<sup>c</sup>Sixteen patients (39.0%) did not provide a secondary aspect of importance.

Three patients (7.3%) provided a third aspect of importance: “energy level,” “a relationship with God,” and “depression.”

**Table S8. Symptoms Alleviated with Study Drug**

| <b>Symptom, n (%)</b>                  | <b>Participants (N=41)</b> |
|----------------------------------------|----------------------------|
| Auditory hallucinations/hearing voices | 26 (63.4)                  |
| Concentration                          | 14 (34.1)                  |
| Paranoia                               | 13 (31.7)                  |
| Anxiety/worry                          | 9 (22.0)                   |
| Depression                             | 8 (19.5)                   |
| Visual hallucinations                  | 7 (17.1)                   |
| Delusions                              | 4 (9.8)                    |
| Mood swings                            | 3 (7.3)                    |
| Racing thoughts                        | 3 (7.3)                    |
| Suicidal thoughts                      | 3 (7.3)                    |
| Headaches                              | 2 (4.9)                    |
| Violent behavior                       | 2 (4.9)                    |
| Irritability/agitation                 | 1 (2.4)                    |
| Muscle tension                         | 1 (2.4)                    |
| Negative self-talk                     | 1 (2.4)                    |
| Personality                            | 1 (2.4)                    |



**Table S9. Change in Impact with Study Drug Treatment**

| <b>Change in Impact, n (%)</b> | <b>N=41</b> |
|--------------------------------|-------------|
| Emotional or mental well-being | 26 (63.4)   |
| Self-esteem                    | 25 (61.0)   |
| Social activity                | 25 (61.0)   |
| Relationships                  | 21 (51.2)   |
| Daily activities               | 19 (46.3)   |
| Sleep                          | 17 (41.5)   |
| Hospitalizations               | 15 (36.6)   |
| Physical health                | 15 (36.6)   |
| Weight                         | 11 (26.8)   |
| General quality of life        | 9 (22.0)    |
| Work                           | 7 (17.1)    |
| Energy                         | 5 (12.2)    |
| School                         | 4 (9.8)     |
| Stability                      | 4 (9.8)     |
| Coping                         | 2 (4.9)     |
| Incarceration                  | 1 (2.4)     |
